# Supplementary material
Source: PubMed Central journal article supplement (PMC6904810)
Supplement: mmc1.pdf [file mmc1.pdf]

## Supplemental Data

### Mutations in *TTC29*, Encoding an Evolutionarily Conserved Axonemal Protein, Result in Asthenozoospermia and Male Infertility

Patrick Lorès, Denis Dacheux, Zine-Eddine Kherraf, Jean-Fabrice Nsota Mbango, Charles Coutton, Laurence Stouvenel, Come Ialy-Radio, Amir Amiri-Yekta, Marjorie Whitfield, Alain Schmitt, Caroline Cazin, Maëlle Givelet, Lucile Ferreux, Selima Fourati Ben Mustapha, Lazhar Halouani, Ouafi Marrakchi, Abbas Daneshpour, Elma El Khouri, Marcio Do Cruzeiro, Maryline Favier, François Guillonneau, Marhaba Chaudhry, Zeinab Sakheli, Jean-Philippe Wolf, Catherine Patrat, Gérard Gacon, Sergey N. Savinov, Seyedeh Hanieh Hosseini, Derrick R. Robinson, Raoudha Zouari, Ahmed Ziyat, Christophe Arnoult, Emmanuel Dulioust, Mélanie Bonhivers, Pierre F. Ray, and Aminata Touré

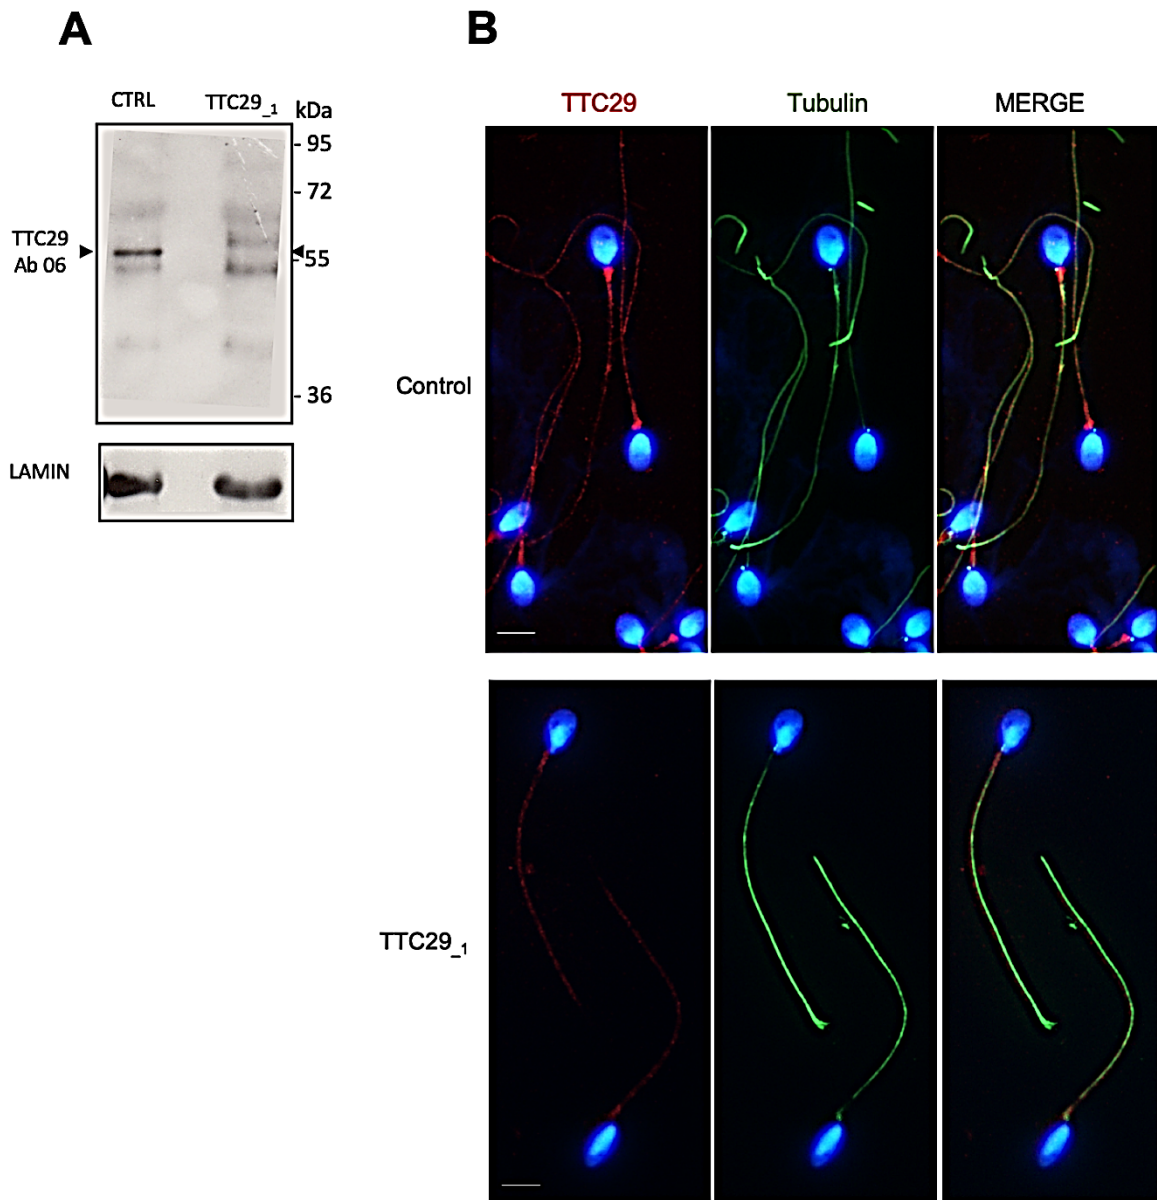

**Figure S1. Functional consequences of the c.176 +1G>A *TTC29* variant on *TTC29* protein amount and distribution.**

**(A)** Western blot on semen samples from control and individual *TTC29*<sub>1</sub>, carrying the c.176 +1G>A mutation, using a the *TTC29* (06) antibody (SIGMA HPA037006). Lamin antibody was used for loading control. **(B)** Immunodetection on semen samples from control and individual *TTC29*<sub>1</sub>, carrying the c.176 +1G>A mutation, using a the *TTC29* (Ab73) antibody. *TTC29* antibody (in red) and Tubulin (in green). Cells were counterstained with DAPI (in blue) as nuclei marker. Scale bars represent 5  $\mu$ m.

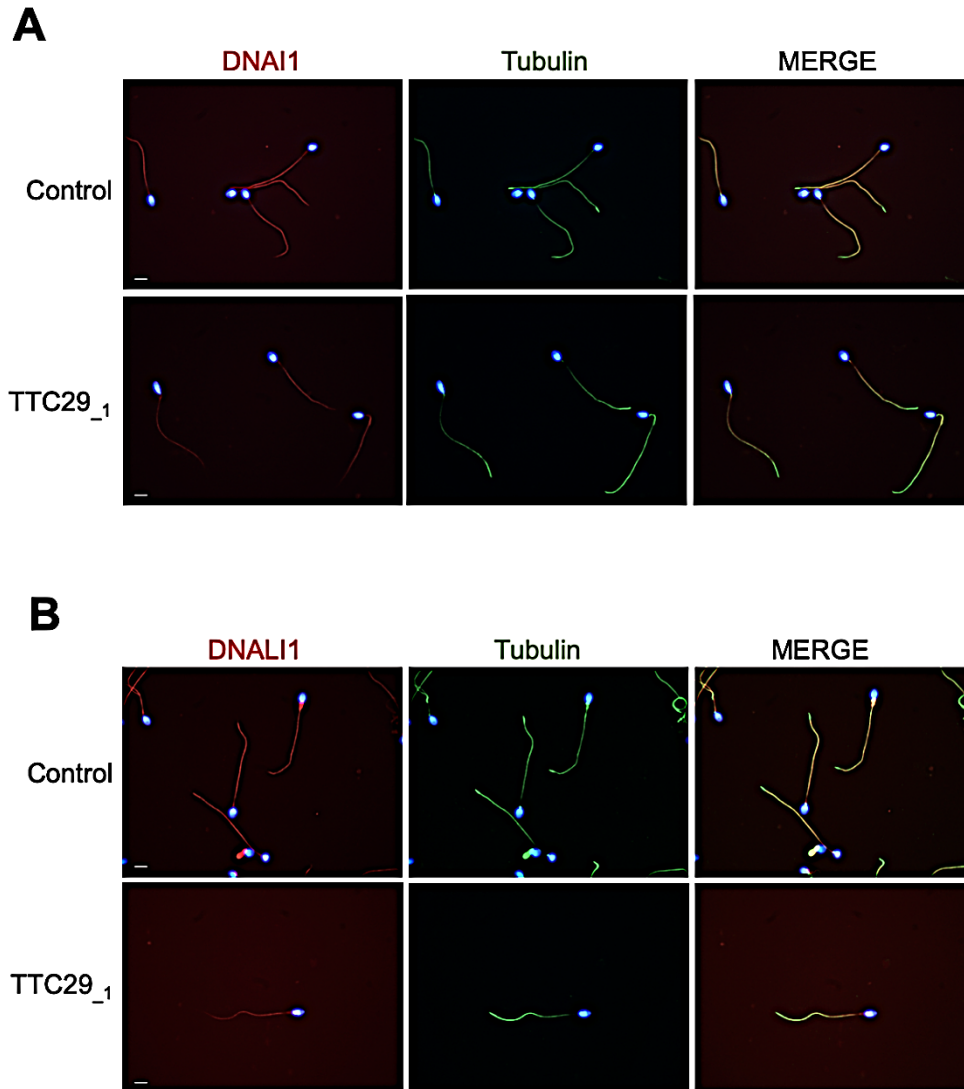

**Figure S2. Immunostaining of DNAI1 and DNALI1 in spermatozoa from control individual and individual TTC29\_1, carrying the c.176 +1G>A mutation.**

(A) Immunofluorescence staining of spermatozoa from control and from individual TTC29\_1 with DNAI1 (an intermediate chain of Outer dynein Arms, ODAs, in red) and  $\alpha$ -Tubulin (in green). (B) Immunofluorescence staining of spermatozoa from control and from individual TTC29\_1 with DNALI1 (an associated protein of Inner dynein Arms, IDAs, in red) and  $\alpha$ -Tubulin (in green). Spermatozoa were counterstained with DAPI (blue) as nuclei marker. Scale bars represent 5 $\mu$ m.

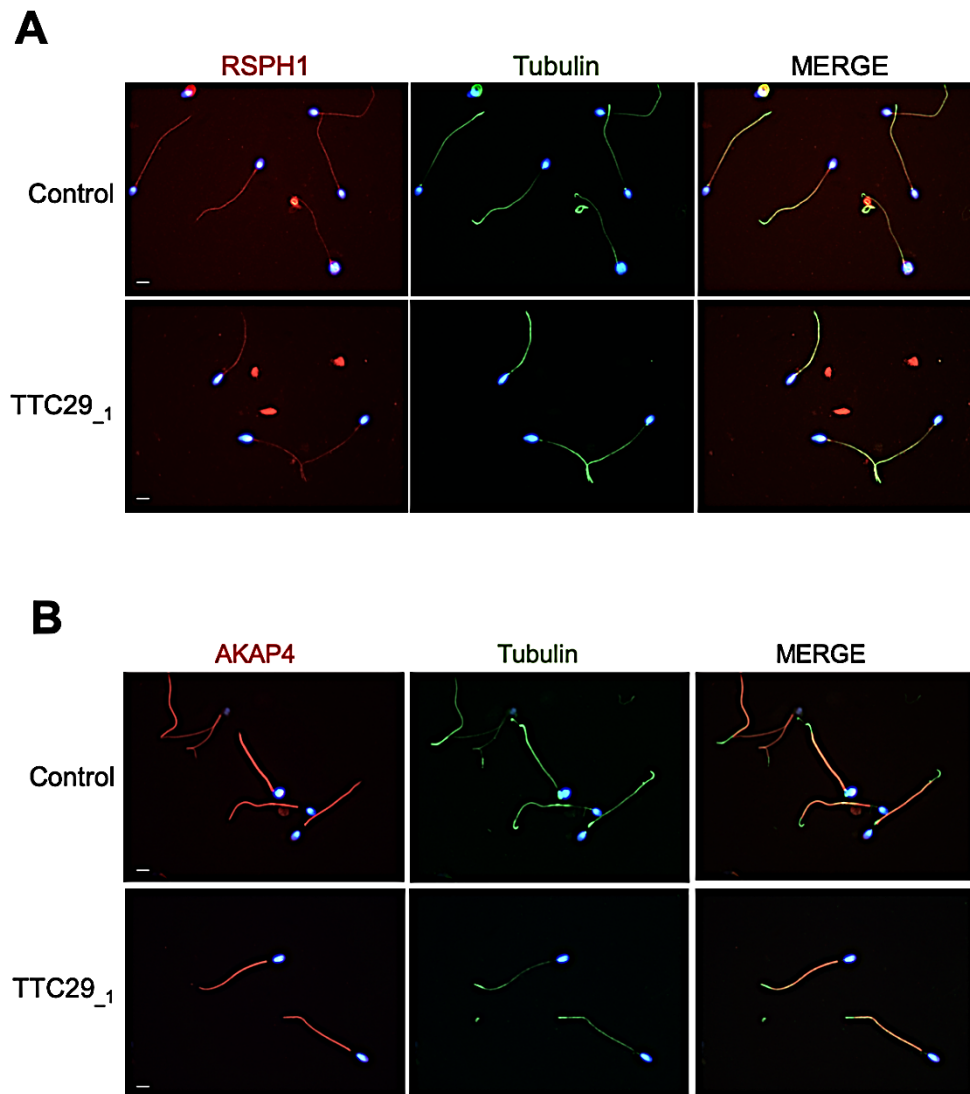

**Figure S3. Immunostaining of RSPH1 and AKAP4 in spermatozoa from control individual and individual TTC29\_1, carrying the c.176 +1G>A mutation.**

(A) Immunofluorescence staining of spermatozoa from control and from individual TTC29\_1 with RSPH1 (a component of Radial Spokes, RSs, in red) and  $\alpha$ -Tubulin (in green). (B) Immunofluorescence staining of spermatozoa from control and from individual TTC29\_1 with AKAP4 (a component of the Fibrous Sheath, FS, in red) and  $\alpha$ -Tubulin (in green). Spermatozoa were counterstained with DAPI (blue) as nuclei marker. Scale bars represent 5 $\mu$ m.

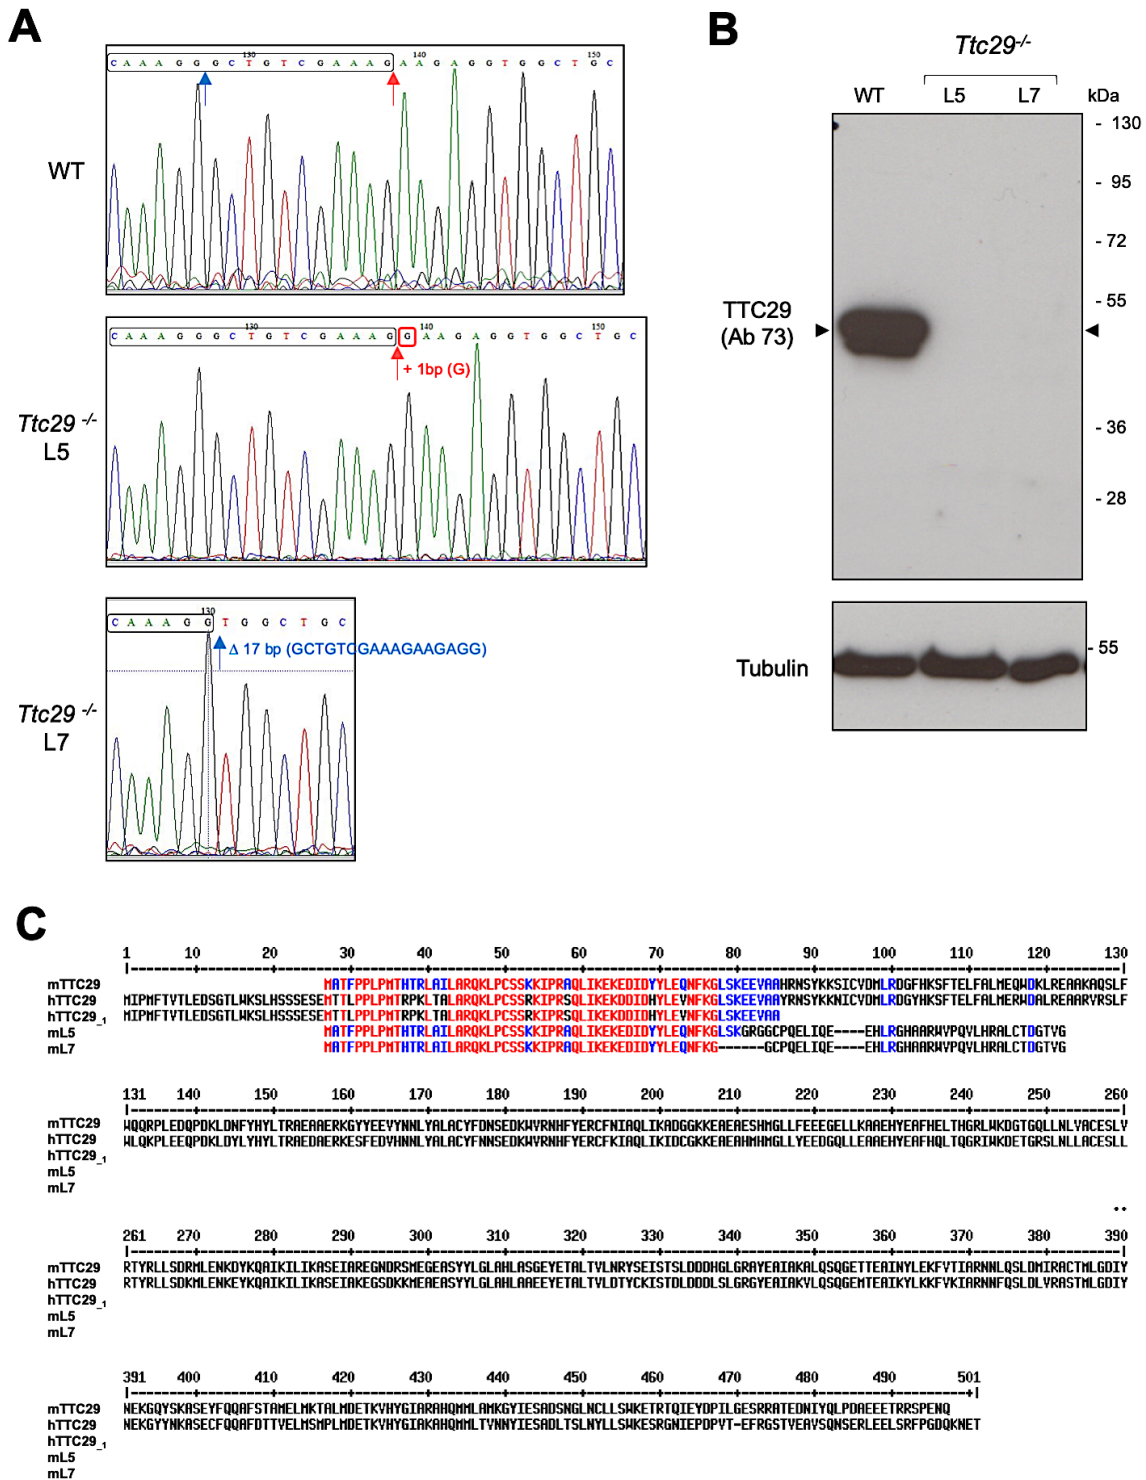

**Figure S4. Generation of *Ttc29* mutant mice by CRISPR-Cas9 gene editing technology.**

(A) Sanger sequencing of genomic DNA from *Ttc29*<sup>-/-</sup> L5 and L7 mutant mice compared to control mouse. The chromatograms show the insertion of one base in *Ttc29* exon 5 for the *Ttc29*<sup>-/-</sup> L5 mutant line and the deletion of 17 bases in *Ttc29* exon 5 for the *Ttc29*<sup>-/-</sup> L7 mutant line. (B) Western blot analysis of testis protein extracts from *Ttc29*<sup>-/-</sup> L5 and L7 mutant mice using TTC29 (73) antibody directed against the N-terminus of the protein, which show the absence of protein. Tubulin was used as loading control. (C) Sequence alignment of the predicted encoded proteins in *Ttc29*<sup>-/-</sup> L5 and L7 mutant mice (mL5 and mL7, respectively) compared to wild-type mouse and human TTC29 proteins (mTTC29 and hTTC29, respectively) and the theoretical truncated protein resulting from the c.176 +1G>A splicing mutation in individual TTC29<sub>1</sub> (hTTC29<sub>1</sub>).

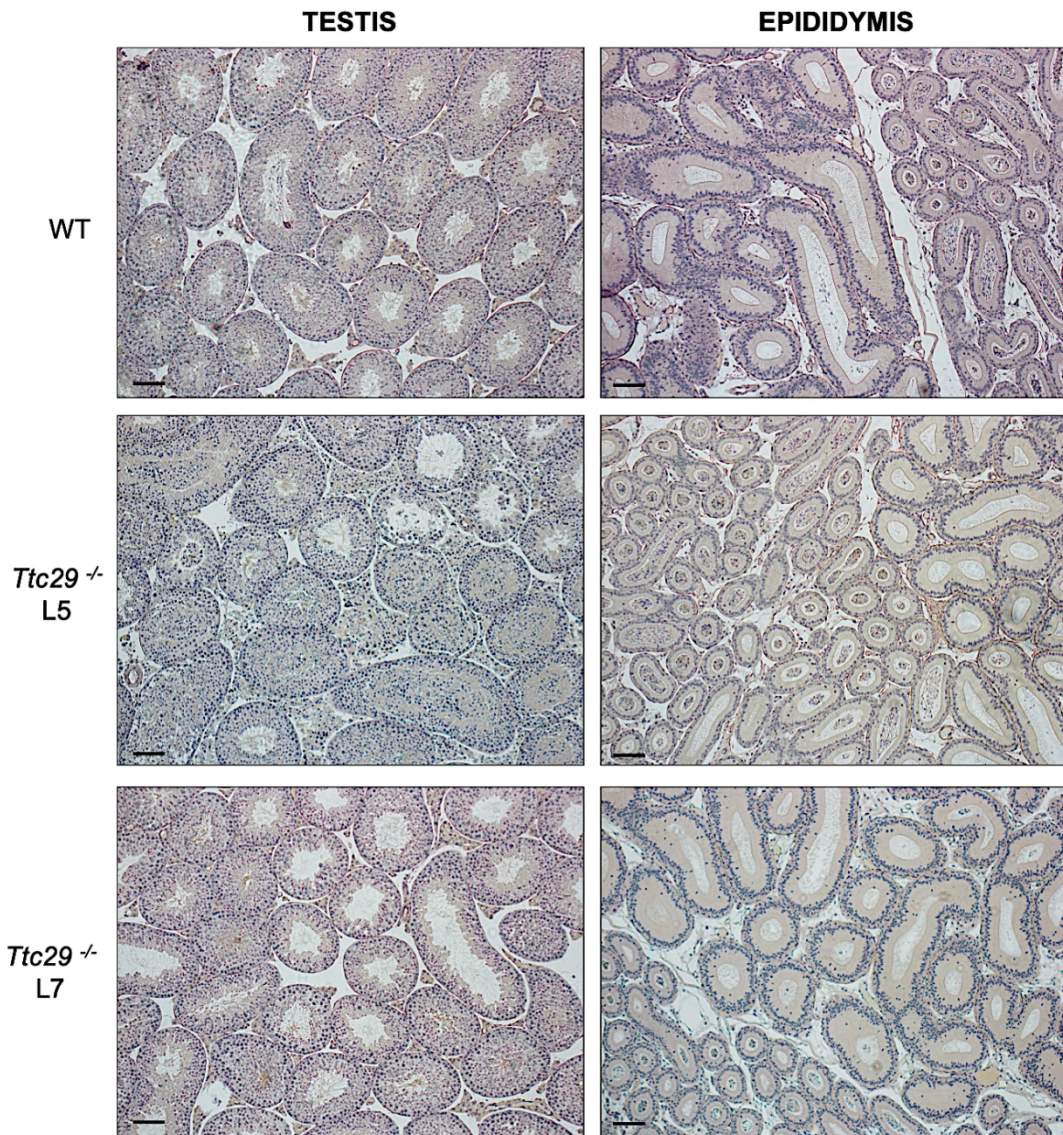

**Figure S5. Histological analysis of testes and epididymides from *Ttc29*<sup>-/-</sup> L5 and L7 mutant mice.** Hematoxylin and eosin staining of testes and epididymides from *Ttc29*<sup>-/-</sup> L5 and L7 mutant mice. Scale bars indicate 50 $\mu$ m.

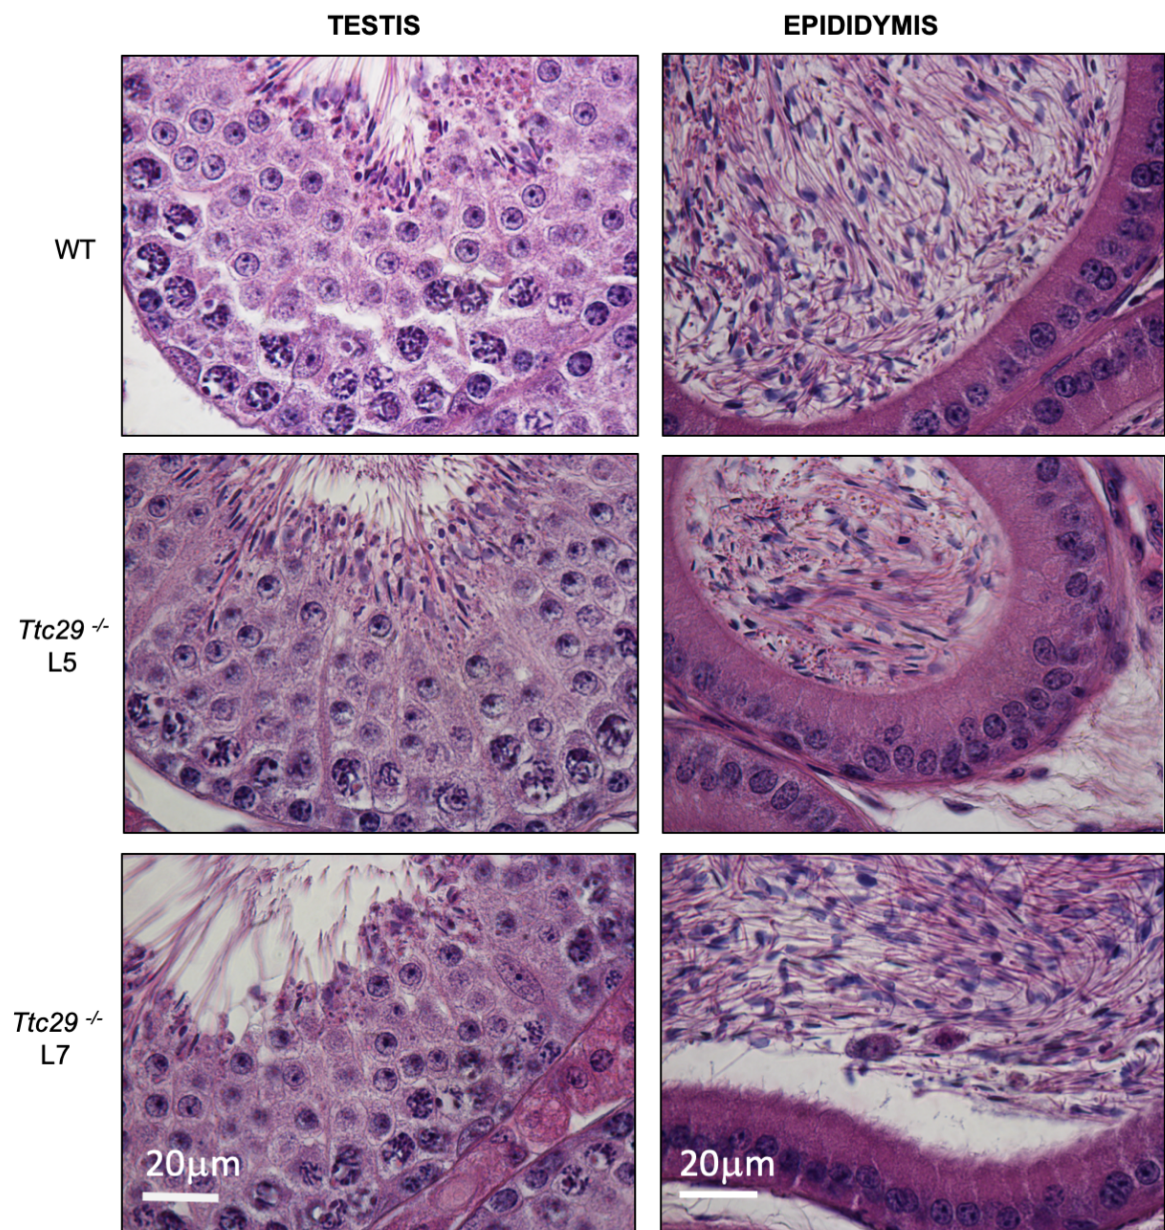

**Figure S6. High magnification of testis tubule and epididymis section from *Ttc29*<sup>-/-</sup> L5 and L7 mutant mice. Hematoxylin and eosin staining of testes and epididymides from *Ttc29*<sup>-/-</sup> L5 and L7 mutant mice. Scale bars indicate 20µm.**

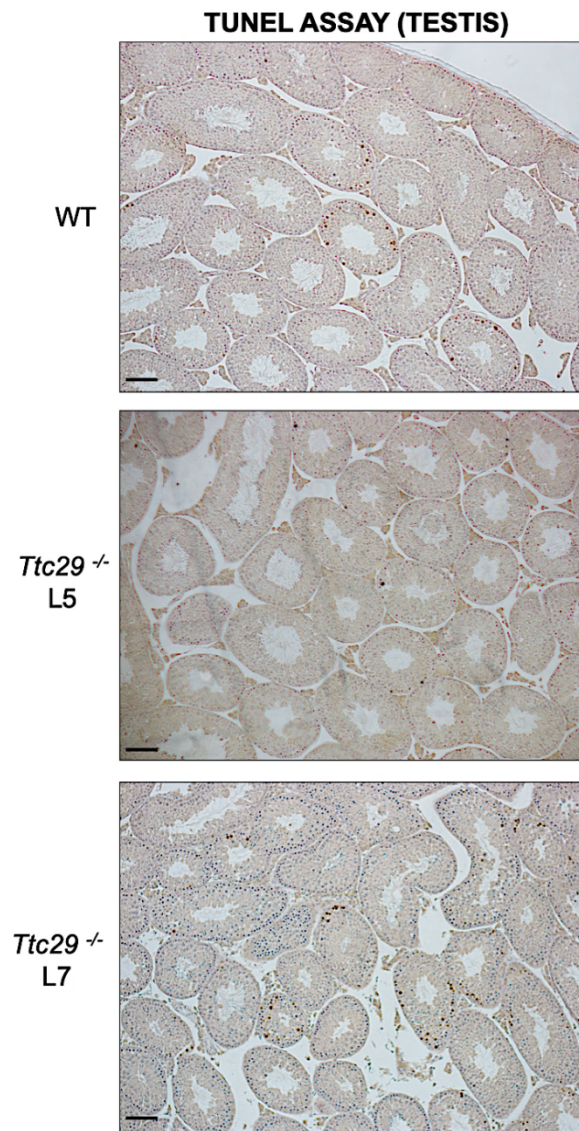

**Figure S7. Detection of apoptotic cells in testes from *Ttc29*<sup>-/-</sup> L5 and L7 mutant mice.** Testes paraffin embedded sections processed for TUNEL assay. Scale bars indicate 50 $\mu$ m.



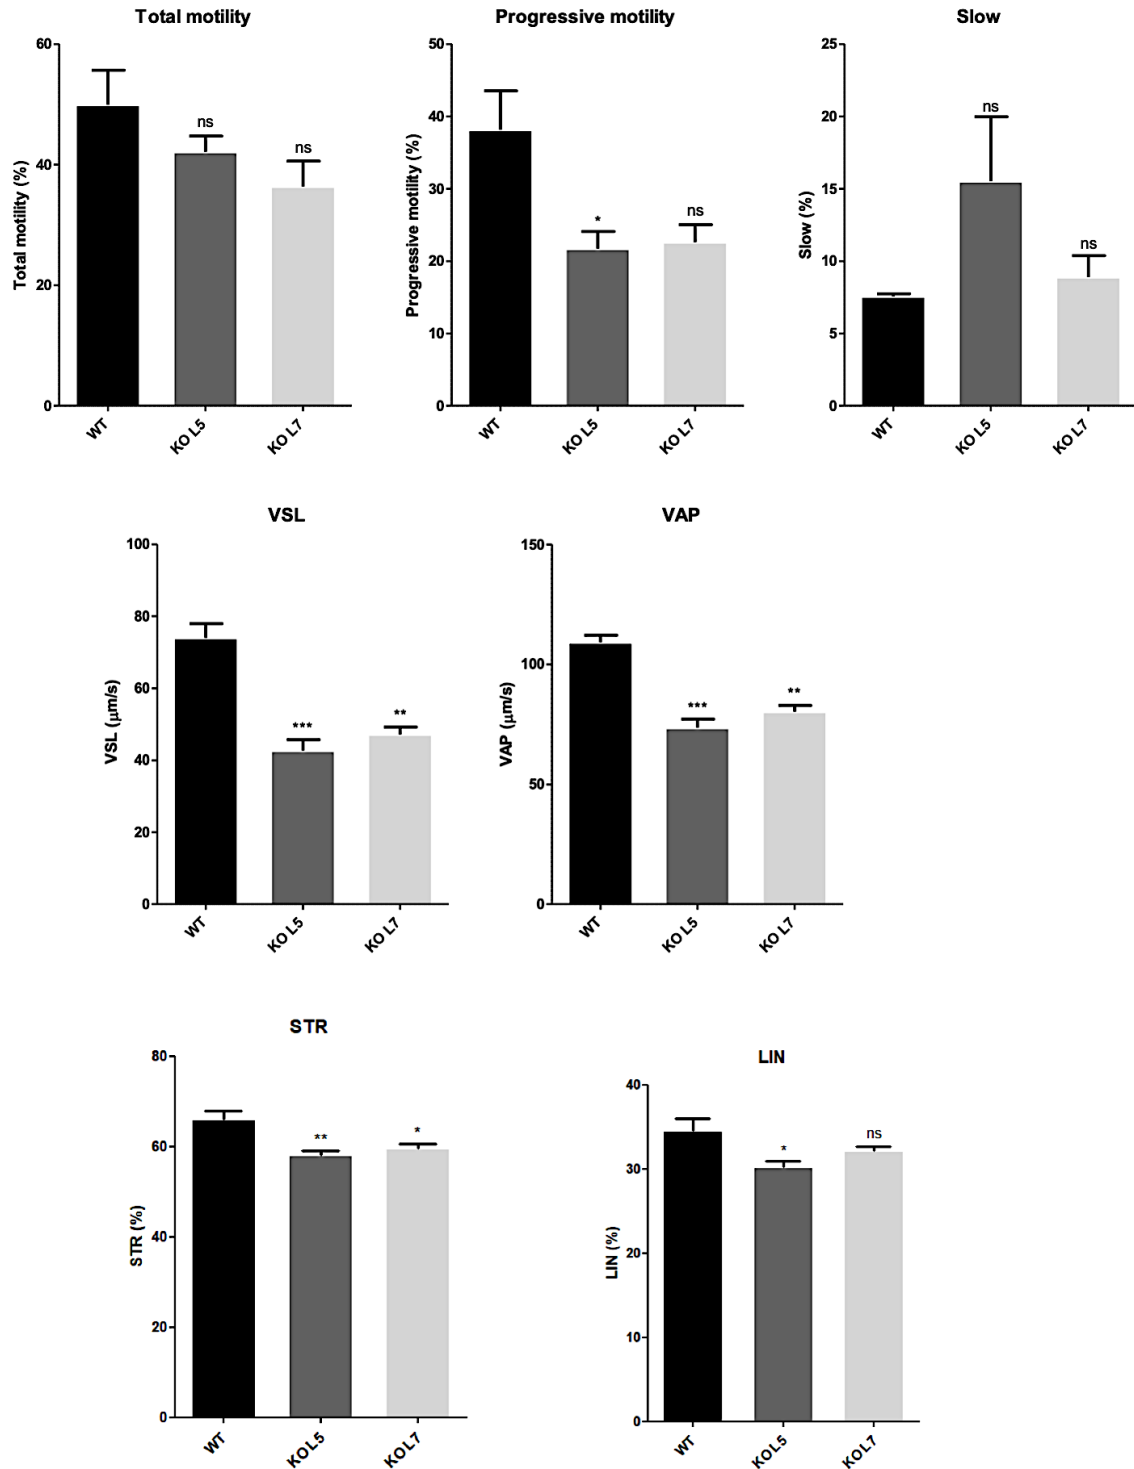

**Figure S8. Assessment of sperm motility parameters of *Ttc29*<sup>-/-</sup> L5 and L7 mutant mice using Computer Aided Sperm Analysis (CASA).**

Sperm kinematic movements of *Ttc29*<sup>-/-</sup> L5 and L7 mutant mice were measured using CASA system (CEROS II, Hamilton). N=3 for each genotype. The following parameters are reported: percentage of motile cells (total motility), percentage of progressive cells (progressive motility), percentage of slow cells, straight-line velocity (VSL), average-path velocity (VAP), straightness (STR) and linearity (LIN). Data are represented as the mean  $\pm$  SEM. p-value <0.05 (\*); p-value <0.01 (\*\*); p-value <0.001 (\*\*\*); non-significant (ns).

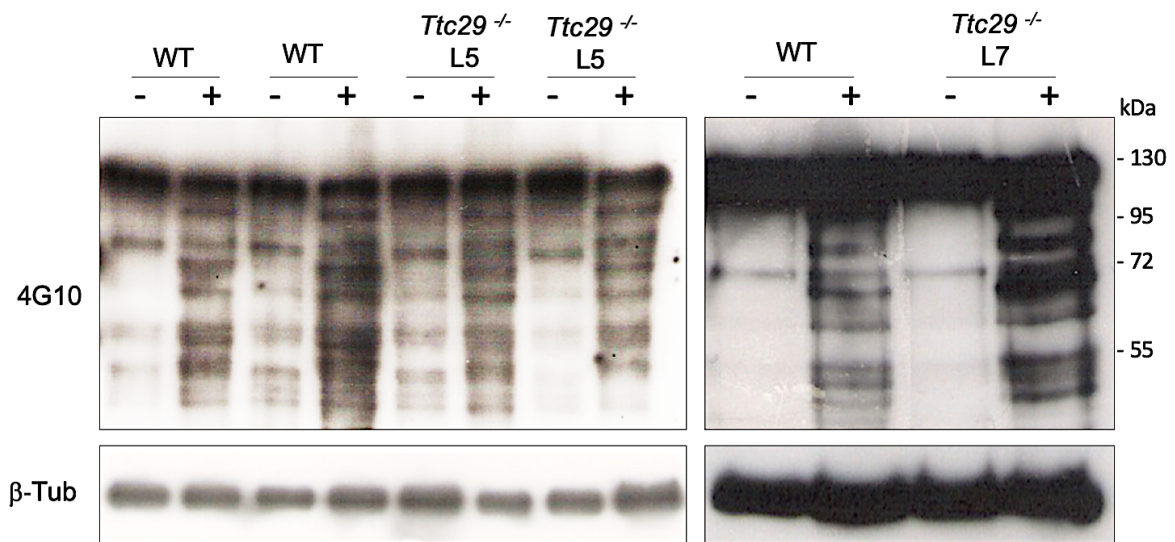

**Figure S9. Evaluation of the capacitation-associated tyrosine-phosphorylation profile of *Ttc29*<sup>-/-</sup> L5 and L7 mutant sperm.**

Spermatozoa from control (WT) and *Ttc29*<sup>-/-</sup> L5 and L7 mutant mice were retrieved from cauda epididymes and incubated in non-capacitating medium (-) or medium supporting capacitation (+). Anti-phosphotyrosine immunoblotting was performed with 4G10 antibody. Tubulin (β-Tub) was used as loading control.

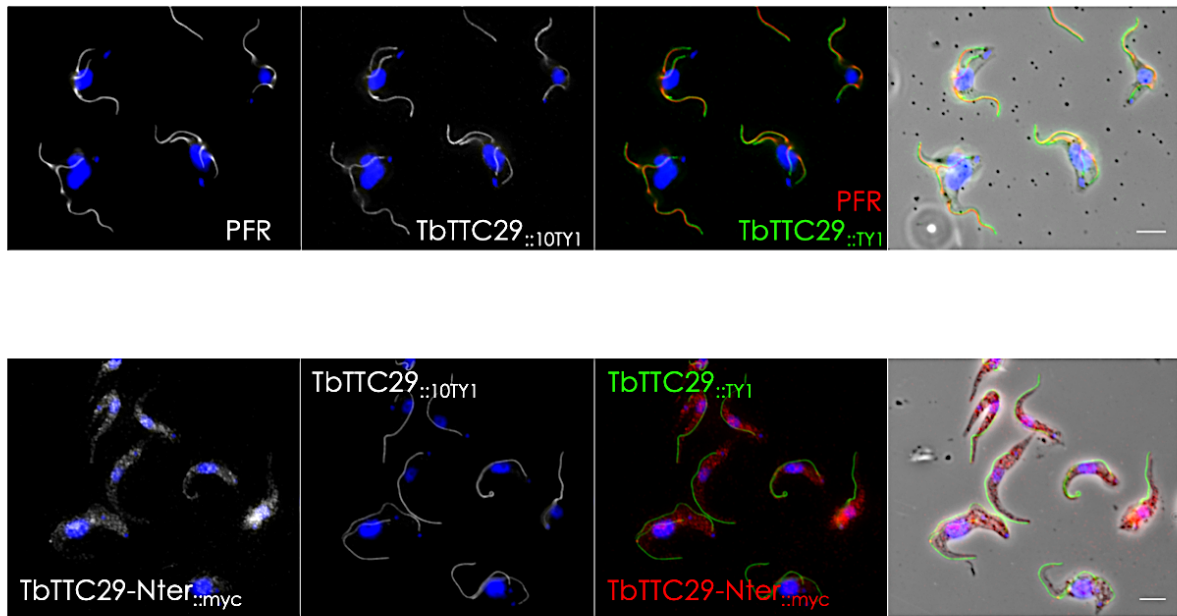

**Figure S10. Localization of TbTTC29 in *T. brucei* cell lines.**

Low magnification pictures of TbTTC29::TY1 (upper panel) and TbTTC29::TY1/TbTTC29-Nter::myc (lower panel) immunolabelling with anti-PFR (red), anti-Myc (red) and anti-TY1 (green) antibodies. The mitochondrial genome and the nuclei are stained with DAPI. Scale bars represent 5  $\mu$ m.



| Primer name  | Primer sequence (5'-3')   | T <sub>m</sub> | Product size (bp) |
|--------------|---------------------------|----------------|-------------------|
| TTC29_Ex5-F1 | CTCCTGGTGGCATTATGTGT      | 60°C           | 378               |
| TTC29_Ex5-R1 | GGTAAATATGGGAATTTGAGAGCCA |                |                   |
| TTC29_Ex6-F1 | TGTGGACATGCTGCGAGATG      | 60°C           | 426               |
| TTC29_Ex6-R1 | TGTGTTGTCTTCCCTGGCTC      |                |                   |

**Table S1.** Primer sequences used for Sanger sequencing verification of *TTC29* mutations and respective melting temperatures (T<sub>m</sub>) and product sizes.

| Primer name   | Primer sequences (5'-3') | T <sub>m</sub> | Product size (bp) |
|---------------|--------------------------|----------------|-------------------|
| hTTC29_RT-fw3 | GAAGCTTACAGCCTTAGCC      | 60°C           | 264               |
| hTTC29_RT-rv4 | ACTCTCGCAGCCTCCCTC       |                |                   |

**Table S2.** Primers used for RT-PCR of *TTC29* in human samples and respective melting temperatures (T<sub>m</sub>) and product sizes.

| Antibody                       | Species | End-use   | WB dilution | IF dilution | Provider & Reference |
|--------------------------------|---------|-----------|-------------|-------------|----------------------|
| <b>Human and Mouse studies</b> |         |           |             |             |                      |
| TTC29 (Ab 06)                  | Rabbit  | Primary   | 1/100       |             | Sigma HPA037006      |
| TTC29 (Ab 73)                  | Rabbit  | Primary   | 1/400       | 1/100       | Sigma HPA061473      |
| 4G10                           | Mouse   | Primary   | 1/1000      |             | Sigma-Upstate 05-321 |
| AKAP4                          | Rabbit  | Primary   |             | 1/400       | Sigma HPA020046      |
| DNAI1                          | Rabbit  | Primary   |             | 1/100       | Sigma HPA021649      |
| DNALI1                         | Rabbit  | Primary   |             | 1/100       | Sigma HPA028305      |
| SPAG6                          | Rabbit  | Primary   |             | 1/200       | Sigma HPA038440      |
| $\alpha$ -Tubulin              | Mouse   | Primary   |             | 1/500       | Sigma T9026          |
| $\beta$ -Tubulin               | Mouse   | Primary   | 1/5000      |             | Sigma-Upstate 05-661 |
| Lamin B1                       | Mouse   | Primary   | 1/500       |             | Life 33-2000         |
| Rabbit-Ig HRP                  | Swine   | Secondary | 1/1000      |             | DAKO P0217           |
| Mouse-Ig HRP                   | Rabbit  | Secondary | 1/1000      |             | DAKO P0260           |
| Rabbit-Ig Alexa 568            | Goat    | Secondary |             | 1/500       | Thermofischer A11036 |
| Mouse-Ig Alexa 488             | Goat    | Secondary |             | 1/250       | Thermofischer A11001 |
| <b>Trypanosome studies</b>     |         |           |             |             |                      |
| Anti-TY1 tag (BB2)             | Mouse   | Primary   | 1/5000      | 1/200       | P. Bastin            |
| Anti-myc tag                   | Rabbit  | Primary   | 1/1000      | 1/1000      | Sigma C-3956         |
| Anti-mouse HRP                 |         | Secondary | 1/10000     |             | Jackson 515-035-062  |
| Anti-rabbit HRP                |         | Secondary | 1/10000     |             | Sigma A-9169         |
| Anti-PFR2 (L8C4)               | Mouse   | Primary   | 1/1000      |             | K. Gull              |
| Anti-enolase                   | Rabbit  | Primary   | 1/10000     |             | F. Bringaud          |
| Anti-FTZC                      | Rabbit  | Primary   |             | 1/10000     | F. Bringaud          |
| Anti-PFR2                      | Rabbit  | Primary   |             | 1/2000      | N. Biteau            |
| Anti-mouse FITC                | Goat    | Secondary |             | 1/100       | Sigma F-2012         |
| anti-rabbit Alexa594           | Goat    | Secondary |             | 1/100       | Thermofischer A11012 |

**Table S3.** Antibodies used for western blot (WB) and immunofluorescence (IF).

| Primer name  | Primer sequences (5'-3') | Tm   | Product size (bp) |
|--------------|--------------------------|------|-------------------|
| TTC29_scr-fw | CTGATGTGTCTTCTCTTCTGG    | 60°C | 443               |
| TTC29_scr-rv | TAATAGCTCAGACTTAACTCAAT  |      |                   |

**Table S4.** Primers used for screening of *Ttc29* CRIPR mutant mice and respective melting temperatures (Tm) and product sizes

|                                 | Primer name                      | Primer sequences (5'-3')                                                                                                             |
|---------------------------------|----------------------------------|--------------------------------------------------------------------------------------------------------------------------------------|
| TbTTC29<br>endotagging          | <u>1321-F-TbTTC29</u>            | <u>CGGGGGGAGGACGCGGATATGTGCCAATTGTATGT</u><br><u>GATGATGTAAAGGCACAACACTAGAGTGGATGAGTAA</u><br><u>TGGCATCTTG ggttctgtagtggttcc</u>    |
|                                 | <u>1322-R-TbTTC29</u>            | <u>CGTCTCCCCCCCCCAAAAAAAAAAAAAACCTCCTCAC</u><br><u>CCTTCCGAGAATAAACAGATAAATCCTCCTTCGGA</u><br><u>TCGTCACCAA ccaatttgagagacctgtgc</u> |
| TbTTC29-<br>Nter<br>endotagging | <u>1321-F-TbTTC29</u>            | <u>CGGGGGGAGGACGCGGATATGTGCCAATTGTATGT</u><br><u>GATGATGTAAAGGCACAACACTAGAGTGGATGAGTAA</u><br><u>TGGCATCTTG ggttctgtagtggttcc</u>    |
|                                 | <u>1339-F-TbTTC29-<br/>DCter</u> | <u>CCTCTATCAAAGATGGATTTTCCACCGCTGCCGGG</u><br><u>GGCGTAACTGCGCGTCGGTTGTGGTGGCACAAAG</u><br><u>TGAAAAGGAC ggttctgtagtggttcc</u>       |
| RNAi                            | <u>841-F-TTC29mai</u>            | <u>GCCGGCCGCTCTAGAgatggattttccaccgtgcc</u>                                                                                           |
|                                 | <u>842-R-TTC29mai</u>            | <u>TAAGCTTGCTCTAGAgcaccaaacgacaaacgcacc</u>                                                                                          |

**Table S5.** Primers used for TbTTC29, TbTTC29-Nter endotagging and for the RNAi construct.

|                    | <b>228</b><br>WT  | <b>228p</b><br>WT | <b>470</b><br>WT | <b>471</b><br>WT   | <b>227</b><br>KO L5 | <b>227p</b><br>KO L5 | <b>479</b><br>KO L5 | <b>488</b><br>KO L7 |
|--------------------|-------------------|-------------------|------------------|--------------------|---------------------|----------------------|---------------------|---------------------|
| ACTMLGDIYNEK       | 822440 [1]        | 1138000 [3]       | 217930 [2]       | 267560 [1]         | 0                   | 0                    | 0                   | 0                   |
| AHQMMLAMK          | 0                 | 192340 [2]        | 336170 [2]       | 408230 [2]         | 0                   | 0                    | 0                   | 0                   |
| ALQSQGETTEAINYLEK  | 3351400 [3]       | 3564400 [3]       | 1397800 [2]      | 989570 [2]         | 0                   | 0                    | 0                   | 0                   |
| ASEYFQQAFSTAMELMK  | 0                 | 0                 | 0                | 123260 [1]         | 0                   | 0                    | 0                   | 0                   |
| AYEAIK             | 3126200 [2]       | 3788300 [2]       | 3971400 [3]      | 648640 [1]         | <b>41600 [1]</b>    | 0                    | 0                   | 0                   |
| CFNIAQLIK          | <b>271230 [1]</b> | 169320 [1]        | 693210 [2]       | 990080 [1]         | 0                   | 0                    | 0                   | 0                   |
| DGTGQLLNLVACESLVR  | 680510 [4]        | 1438100 [4]       | 2056100 [4]      | 2040200 [4]        | 0                   | 0                    | 0                   | 0                   |
| EKEDIDYYLEQNFK     | 2102400 [1]       | 0                 | 0                | <b>812300 [2]</b>  | 0                   | 0                    | 0                   | 0                   |
| GYIESADSNGLNCLLSWK | 221440 [1]        | 0                 | 0                | 458180 [1]         | 0                   | 0                    | 0                   | 0                   |
| NNLQSLDMIR         | 3840000 [3]       | 4006500 [2]       | 2839900 [1]      | 2578100 [1]        | 0                   | 0                    | 0                   | 0                   |
| TALMDETK           | 3196700 [1]       | 3369700 [1]       | 2862600 [1]      | <b>2165400 [1]</b> | 0                   | 0                    | 0                   | <b>619110 [1]</b>   |
| TQIEYDPILGESR      | 2605400 [2]       | 2865700 [2]       | 3347200 [2]      | 4053100 [2]        | 0                   | 0                    | 0                   | 0                   |
| YSEISTSLDDDHGLGR   | 4574100 [2]       | 4046600 [3]       | 2619500 [3]      | 4213000 [4]        | 0                   | 0                    | 0                   | 0                   |

**Table S6.** TTC29 peptides identification by tandem mass spectrometry (MS/MS) analysis on purified flagella preparations from control and *TTC29*<sup>-/-</sup> L5 and L7 mutant sperm.

Tandem mass spectrometry (MS/MS) analysis was performed on purified flagella preparations from control (WT) and *TTC29*<sup>-/-</sup> L5 and L7 KO sperm. N=4 for controls and N=4 for *TTC29*<sup>-/-</sup> mutants. For each TTC29 peptide identified, the Label-Free Quantification intensity (LFQ) is reported and the number of times the peptide was identified is indicated in brackets. Peptides which were not directly identified by MS/MS but uncovered by Match Between Runs (MBR) are indicated in bold characters.

The position of all identified peptides is indicated below, in bold characters, in the TTC29 mouse protein sequence; the position of the mutation in the crispr mutant mouse lines is indicated by the arrow.

MATFPPLPMTHTRLAILARQKLPCSSKKIPRAQLIKE**KEDIDYYLEQNF**KGLSKEEVAHRNSYKCSI  
CVDMLRDGFHKSFTALFALMEQWDKLPEAAKAQSLFWQQRPLEDQPKLDNFYHYLTRAEEAERK  
GYEYEVYNNLYALACYFDNSEDKWVRNHFYER**CFNIAQLIK**ADGGKKEAEAESHMGLLFEEEGELL  
KAAEHYEAHELTHGRLWK**DGTGQLLNLVACESLVR**TYRLLSDRMLLENKDYKQAIKILIKASEIAR  
EGNDRSMEGEASYLGLAHLASGEYETALTVLNRY**SEISTSLDDDHGLGR**AYEAIKALQSQGETT  
**EAINYLEK**FTIARNNLQSLMIRACTMLGDIYNEKGQYSKASEYFQQAFSTAMELMKTALMDET  
**KVHYGIARAHQMMLAMKGYIESADSNGLNCLLSWK**ETRTQIEYDPILGESRRATEDNIYQLPDA  
EEETRRSPENQ



| PROTEIN | 228<br>WT | 228p<br>WT | 470<br>WT | 471<br>WT | 227<br>KO | 227p<br>KO | 479<br>KO | 488<br>KO | p-value       |
|---------|-----------|------------|-----------|-----------|-----------|------------|-----------|-----------|---------------|
| DNAI1   | 181370000 | 168860000  | 106510000 | 102320000 | 143230000 | 169540000  | 96107000  | 139330000 | 0,973976 (ns) |
| DNALI1  | 193290000 | 201340000  | 236420000 | 212420000 | 166060000 | 209250000  | 167240000 | 212400000 | 0,204586 (ns) |
| RSPH1   | 52203000  | 57131000   | 56484000  | 74144000  | 55574000  | 57388000   | 65614000  | 89196000  | 0,476173 (ns) |
| SPAG6   | 143730000 | 135270000  | 172810000 | 144230000 | 147200000 | 150620000  | 127570000 | 159020000 | 0,801091 (ns) |
| TTC29   | 21310000  | 21801000   | 22040000  | 24310000  | 0         | 0          | 0         | 0         | 0,000117 (**) |

**Table S7.** Axonemal protein identification by tandem mass spectrometry (MS/MS) analysis on purified flagella preparations from control and *TTC29*<sup>-/-</sup> L5 and L7 mutant sperm.

Tandem mass spectrometry (MS/MS) analysis was performed on purified flagella fractions from wild type (WT) and *TTC29*<sup>-/-</sup> L5 and L7 KO sperm. N=4 for controls and N=4 for *TTC29*<sup>-/-</sup> mutants. The Label-Free Quantification intensity (LFQ) for identified peptides matching the protein sequence of DNAI1, DNALI1, RSPH1 and SPAG6 and TTC29, is reported for each animal. t-student test was performed to compare the LFQ of the tested protein between WT and KO genotypes. In contrast to TTC29, which was not detected in flagella preparations from the mutant mice, all axonemal proteins were present in similar amount than in the wild type preparations. p-value <0.01 (\*\*); non-significative (ns).

## Supplemental material and methods

### Western blot analysis on human sperm cells or mouse testis extracts

Denatured protein samples corresponding to equal amounts of human spermatozoa or mouse testis extracts were loaded on SDS-PAGE (12% acrylamide/bisacrylamide (40% 37.5:1)) and transferred onto nitrocellulose membranes as previously described<sup>1,2</sup>. The membranes were blocked in 5% milk in PBS-Tween 0.1% or 3% BSA in TBS-Tween 0.1%, and immunoblot analysis was performed using the indicated primary antibodies. Details of antibodies and dilutions used for western blot assays are provided in Table S4.

### Immunofluorescence analysis of human sperm cells

10 µl of semen samples were spread onto a Superfrost Plus slide (Menzel Glasbearbeitungswerk, GmbH & Co. KG, Braunschweig, Germany). Sperm was fixed by incubation with PBS/4% paraformaldehyde for 10 minutes. The slides were incubated 20 minutes at 95°C in citrate buffer (H-3300, VectorLabs, Burlingame, CA, USA). The slides were next treated with 0.2% Triton in PBS for permeabilization and then blocked by incubation in 1% BSA for 1 hour. They were then incubated with primary antibodies for 2 hours at room temperature and then secondary antibodies for one hour at room temperature. The slides were mounted in Vectashield medium (Vector Laboratories, Burlingame, USA) supplemented with 0.5 µg/ml DAPI. Slides were analyzed with a Zeiss Axiophot epifluorescence microscope. Digital images were acquired with a cooled charge-coupled device (CCD) camera (Hamamatsu Co. Japan), under identical instrument settings, with MetaMorph® software (Molecular Devices, Inc. USA). Details of antibodies and dilutions used for immunofluorescence assays are provided in Table S4.

### Histological analysis of mouse testes and epididymes

Testes and epididymides from wild type and mutant mice were dissected out and immediately fixed in Davidson's modified buffer for 1 up to 4 hours at room temperature. Fixed tissues were then dehydrated, embedded in paraffin, sectioned at 5 µm. Sections were rehydrated and stained with hematoxylin and eosin. Digital images were acquired with EVOS™ XL Cell Imaging System. Images were further analyzed using ImageJ software.

### TUNEL analysis on mouse sperm

Testes paraffin embedded sections were processed for TUNEL assay using the TACS 2 Tdt DAB kit (Trevingen, Gaithersburg, USA), following manufacturer's instructions. DNA fragmentation in apoptotic cells was detected in situ after peroxidase staining by the TdT-mediated dUTP-biotin end-labeling procedure. For statistical analysis, TUNEL-positive cells were counted in at least 200 seminiferous tubules for each animal.

### Mouse sperm motility analysis

Sperm motility was assessed by Computer Aided sperm Analysis (CASA) using CEROS II apparatus (Hamilton Thorne, Beverly, MA USA). Briefly, mouse sperm cells expelled from the cauda epididymis were recovered into M2 medium (Sigma-Aldrich, Saint-Louis, MO, USA). The movements of at least 500 sperm cells per sample were analyzed in 20 µm chambers (Leja Products B.V., Netherlands) with Zeiss AX10 Lab. A1 microscope (10x objective), using HT CASAI software. The settings were as follows: acquisition rate, 60 Hz; number of frames, 45; minimum head brightness, 175; minimum tail brightness, 80; minimum head size, 10 µm<sup>2</sup>; minimum elongation gate, 1%; maximum elongation gate, 100%; objective magnification factor, 1.2. The percentage of motile cells (total motility), percentage of

progressive cells (progressive motility), percentage of slow cells, straight-line velocity (VSL), average-path velocity (VAP), straightness (STR) and linearity (LIN) were recorded. Progressive sperm cells were characterized by average path velocity (VAP) $>45\mu\text{m/s}$  and straightness (STR=VSL/VAP) $>45\%$ , respectively.

### **Mouse sperm capacitation analysis**

Spermatozoa from control (WT) and *Ttc29*<sup>-/-</sup> L5 and L7 mutant mice were retrieved from cauda epididymides in medium not supporting capacitation (-). Sperm were then diluted to 2 million spermatozoa in 400  $\mu\text{l}$  of the appropriate medium: medium not supporting capacitation (-) or medium containing 1.8mM calcium, 25 mM bicarbonate and 3% albumin, supporting capacitation (+), and incubated during 90 min at 37°C, under an atmosphere containing 5% CO<sub>2</sub> (as previously described<sup>3</sup>). Spermatozoa were washed 3 times with PBS containing a phosphatase inhibitor cocktail (PhosStop, Roche) and protein were extracted and denaturated in Laemmli buffer (4% SDS, 20% glycerol, 10%  $\beta$ -mercaptoethanol, 0.004% bromophenol blue, 0.125 MTris-HCl). For Western blot analysis, proteins were resolved by sodium dodecyl sulfate-polyacrylamide gel electrophoresis (SDS-PAGE) (2  $\times$  10<sup>6</sup> cells/lane) and transferred to nitrocellulose membranes for anti-phosphotyrosine immunoblotting with 4G10 antibody. Tubulin ( $\beta$ -Tub) was used as loading control.

### **Mouse sperm flagella purification**

Spermatozoa were retrieved from mouse epididymides cauda and flagella were purified following previously described protocols<sup>4</sup>. Briefly, the caudal regions of mouse epididymis were dissected in 1 mL of NO medium (NaCl 120mM, KCl 2mM, MgSO<sub>4</sub> 1,2mM, NaH<sub>2</sub>PO<sub>4</sub> 0.36mM, Glucose 5,56mM, Sucrose 18,5mM, Hepes 50mM, NaPyruvate 1mM, pH 7,3) and incubated at 37°C for 15 min. The sperm cells suspension was distributed in 3 tubes (0.3 ml/tube) and sonicated using Diagenode® Bioruptor Pico (3 x 20 seconds of sonication with 1 minute of cooling between each sonication run). Each sample of 0.3 ml was then loaded on 1 ml of 80 % Percoll and centrifuged at 650g during 35 minutes at 4 °C. The top 0,3 mL was discarded and the following 0.2 ml corresponding to the enriched sperm tail fraction was collected, diluted in 1 mL of cold PBS and centrifuged at 16,000g for 70 minutes at 4 °C. The sperm tail enriched pellets were washed once more time with 1 mL of cold PBS and then frozen at -80°C. Quality and purity of the preparations were assessed by microscopic examination.

### **Proteomics analysis using label free quantification**

Purified sperm tail pellets were lysed in 25  $\mu\text{l}$  100 mM TRIS/HCl pH8.5 containing 10 mM TCEP, 40 mM chloroacetamide and 1% sodium deoxycholate, sonicated 3 times and incubated for 5 minutes at 95°C. 20 $\mu\text{g}$  of protein lysate were diluted (1:1) in TRIS 25mM pH 8.5 in 10% Acetonitrile (ACN) and subjected to trypsin digestion with 0.4  $\mu\text{g}$  of sequencing-grade bovine trypsin (Promega) overnight at 37°C. Peptides were separated from deoxycholate using liquid-liquid phase extraction with 50 $\mu\text{L}$  of 1% TriFluoroacetic Acid (TFA) in ethyl-acetate using a six layer home-made Stagetip with Empore disks Styrene- divinylbenzene - Reversed Phase. Sulfonate (SDB RPS) (from 3M). Eluted and dried peptides were solubilized in 2% TFA and fractionated in 5 fractions by hand-made Strong Cation eXchange (SCX) StageTips<sup>5</sup> and analyzed using an U3000 RSLC nanochromatographer eluting into an Orbitrap Fusion mass spectrometer (both from Thermo Scientific). Briefly: peptides from each SCX fraction were separated on a C18 reverse phase column (2 $\mu\text{m}$  particle size, 100 Å pore size, 75 $\mu\text{m}$  inner diameter, 25cm length) with a 145 minutes gradient starting from 99% of solvent A containing 0.1% formic acid in H<sub>2</sub>O, ending in 40% of solvent B containing 80% ACN and 0.085% formic acid in H<sub>2</sub>O. The MS1 scans spanned from 350-1500 m/z with 1.10<sup>6</sup> Automated Gain Control (AGC) target, within 60ms

maximum ion injection time (MIIT) and a resolution setting of 60,000. In a 3 seconds window, as many Higher energy Collisional Dissociation (HCD) dynamic exclusion time of 30s. Precursor selection window was set at 1.6 m/z with quadrupole filtering. HCD Normalized Collision Energy was set at 30% and the ion trap scan rate was set to “rapid” mode with AGC target  $1.10^5$  and 60ms MIIT. The mass spectrometry data were analyzed using Maxquant (v.1.6.1.0) <sup>6</sup>. The database used was a concatenation of human sequences from the Uniprot-Swissprot database (release 2017-05) and the list of contaminant sequences from Maxquant. Cystein carbamidomethylation was set as constant modification and acetylation of protein N-terminus and oxidation of methionine were set as variable modifications. Second peptide search and the “match between runs” (MBR) options were allowed. Label-free protein quantification (LFQ) was done using both unique and razor peptides with at least 2 such peptides required for LFQ. Raw quantitative data quality was evaluated using PTXQC software v. 0.92.3 <sup>7</sup>. Statistical analysis and data comparison were done using the Perseus software version 1.6.2.3 <sup>8</sup>.

## Supplemental references

1. Lores, P., Coutton, C., El Khouri, E., Stouvenel, L., Givelet, M., Thomas, L., Rode, B., Schmitt, A., Louis, B., Sakheli, Z., et al. (2018). Homozygous missense mutation L673P in adenylate kinase 7 (AK7) leads to primary male infertility and multiple morphological anomalies of the flagella but not to primary ciliary dyskinesia. *Hum Mol Genet* 27, 1196-1211.
2. Lores, P., Vernet, N., Kurosaki, T., Van de Putte, T., Huylebroeck, D., Hikida, M., Gacon, G., and Toure, A. (2014). Deletion of MgcRacGAP in the male germ cells impairs spermatogenesis and causes male sterility in the mouse. *Dev Biol* 386, 419-427.
3. Rode, B., Dirami, T., Bakouh, N., Rizk-Rabin, M., Norez, C., Lhuillier, P., Lores, P., Jollivet, M., Melin, P., Zvetkova, I., et al. (2012). The testis anion transporter TAT1 (SLC26A8) physically and functionally interacts with the cystic fibrosis transmembrane conductance regulator channel: a potential role during sperm capacitation. *Hum Mol Genet* 21, 1287-1298.
4. Hashemitabar, M., Sabbagh, S., Orazizadeh, M., Ghadiri, A., and Bahmanzadeh, M. (2015). A proteomic analysis on human sperm tail: comparison between normozoospermia and asthenozoospermia. *J Assist Reprod Genet* 32, 853-863.
5. Kulak, N.A., Pichler, G., Paron, I., Nagaraj, N., and Mann, M. (2014). Minimal, encapsulated proteomic-sample processing applied to copy-number estimation in eukaryotic cells. *Nat Methods* 11, 319-324.
6. Cox, J., Hein, M.Y., Lubner, C.A., Paron, I., Nagaraj, N., and Mann, M. (2014). Accurate proteome-wide label-free quantification by delayed normalization and maximal peptide ratio extraction, termed MaxLFQ. *Mol Cell Proteomics* 13, 2513-2526.
7. Bielow, C., Mastrobuoni, G., and Kempa, S. (2016). Proteomics Quality Control: Quality Control Software for MaxQuant Results. *J Proteome Res* 15, 777-787.
8. Tyanova, S., Temu, T., Sinitcyn, P., Carlson, A., Hein, M.Y., Geiger, T., Mann, M., and Cox, J. (2016). The Perseus computational platform for comprehensive analysis of (prote)omics data. *Nat Methods* 13, 731-740.
